# Supplementary material for: Cost-effectiveness analysis of a digital health-enabled non-communicable disease management intervention: Evidence from Ghana
Source: Research Square preprint supplement (doi:10.21203/rs.3.rs-6574366/v1), 2025-05-27
Supplement: Supplementary file 1 [file a49350ba49038ff2fd1575cc.pdf]

Table 3: Cost of Akoma Pa Intervention

| Cost Description                                  | Quantity | Unit Price (GH ₵) | Amount (GH ₵) | Useful Life   | Amortized Cost (GH ₵)  |
|---------------------------------------------------|----------|-------------------|---------------|---------------|------------------------|
| <b>Equipment set cost (Fixed set-up cost)</b>     |          |                   |               |               |                        |
| Tablet Samsung Galaxy Tab A7 Lite                 | 32       | 1,700.00          | 54,400.00     | 4             | 13,600.00              |
| Phone Samsung Galaxy A03 phone                    | 24       | 890.00            | 21,360.00     | 3             | 7,120.00               |
| Seca Weighing Scale                               | 24       | 600.00            | 14,400.00     | 7             | 2,057.14               |
| Green Life Canada Weighing Scale                  | 24       | 200.00            | 4,800.00      | 6             | 800.00                 |
| Green Life Canada Blood Pressure Monitors         | 24       | 600.00            | 14,400.00     | 4             | 3,600.00               |
| AND Medical Blood pressure Monitors               | 48       | 800.00            | 38,400.00     | 4             | 9,600.00               |
| Greenlife Canada portable wall mount Height Meter | 48       | 250.00            | 12,000.00     | 7             | 1,714.29               |
| One Touch stat strip Express glucometer           | 32       | 300.00            | 9,600.00      | 3             | 3,200.00               |
| SD Biosensor Code free glucometer                 | 24       | 170.00            | 4,080.00      | 3             | 1,360.00               |
| Waist circumference tape measure                  | 48       | 5.00              | 240.00        | 3             | 80.00                  |
| Medical safety box                                | 24       | 100.00            | 2,400.00      | 1             | 2,400.00               |
| Community health worker backpack                  | 24       | 150.00            | 3,600.00      | 3             | 1,200.00               |
| Patient ID Card                                   | 2500     | 3.60              | 9,000.00      | 1             | 9,000.00               |
| Blood Chemistry Analyzer (Hba1C)                  | 8        | 12,000.00         | 96,000.00     | 8             | 12,000.00              |
| Rechargeable Batteries for BP monitors            | 384      | 20.00             | 7,680.00      | 4             | 1,920.00               |
| <i>Sub-Total</i>                                  |          |                   |               |               | <i>69,651.43</i>       |
| <b>Consumables (Variable Cost)</b>                |          |                   |               | <b>Months</b> | <b>Annualized cost</b> |
| Utility cost for NCD clinic (Electricity)         | 8        | 3,000.00          | 24,000.00     | 12            | 288,000.00             |
| Utility cost for NCD clinic (Water)               | 8        | 1,500.00          | 12,000.00     | 12            | 144,000.00             |
| Maintenance                                       | 8        | 5,000.00          | 40,000.00     | 12            | 480,000.00             |
| Monthly incentive for program facility            | 8        | 1,100.00          | 8,800.00      | 12            | 105,600.00             |
| Medicines' cost                                   | 8        | 5,446.77          | 5,446.77      | 12            | 65,361.24              |
| Latex gloves                                      | 80       | 15.00             | 1,200.00      | 12            | 14,400.00              |
| Twist top lancet                                  | 80       | 15.00             | 1,200.00      | 12            | 14,400.00              |
| Alcohol swabs                                     | 80       | 25.00             | 2,000.00      | 12            | 24,000.00              |
| Surgical spirits                                  | 80       | 25.00             | 2,000.00      | 12            | 24,000.00              |

|                    |      |       |           |    |                     |
|--------------------|------|-------|-----------|----|---------------------|
| Cotton wool        | 40   | 12.00 | 480.00    | 12 | 5,760.00            |
| Face mask          | 80   | 10.00 | 800.00    | 12 | 9,600.00            |
| Glucose test strip | 3000 | 7.00  | 21,000.00 | 12 | 21,000.00           |
| Hba1c cartridges   | 1472 | 46.00 | 67,712.00 | 12 | 67,712.00           |
| <i>Sub-Total</i>   |      |       |           |    | <i>1,263,833.24</i> |

---

**Program Staff Salary Cost (Medtronic Labs)**


---

|                             |   |           |  |    |                   |
|-----------------------------|---|-----------|--|----|-------------------|
| Operations/Ground Personnel | 1 | 6,312.40  |  | 12 | 75,748.80         |
| Tele-counsellor             | 1 | 7,890.50  |  | 12 | 94,686.00         |
| Operations Manager          | 1 | 14,202.90 |  | 12 | 170,434.80        |
| Counselling Leads           | 1 | 20,764.86 |  | 12 | 249,178.32        |
| Operations Associates       | 1 | 9,578.70  |  | 12 | 114,944.40        |
| Program Lead                | 1 | 18,717.00 |  | 12 | 224,604.00        |
| <i>Sub-Total</i>            |   |           |  |    | <i>929,596.32</i> |

---

**Facility Staff involved in Akoma Pa**


---

**Annual Salary**


---

|                        |   |           |   |  |                     |
|------------------------|---|-----------|---|--|---------------------|
| Medical Officer        | 2 | 47,347.27 | 8 |  | 757,556.32          |
| Pharmacist             | 2 | 41,373.98 | 8 |  | 661,983.68          |
| Enrolled Nurse         | 2 | 17,512.93 | 8 |  | 280,206.88          |
| Lab Scientist          | 2 | 29,533.05 | 8 |  | 472,528.80          |
| Nutritionist           | 2 | 32,676.18 | 8 |  | 522,818.88          |
| Community Health Nurse | 3 | 15,563.67 | 8 |  | 373,528.08          |
| <i>Sub-Total</i>       |   |           |   |  | <i>3,068,622.64</i> |

---

**Training and Capacity Building Cost**


---

|                                           |   |           |   |  |           |
|-------------------------------------------|---|-----------|---|--|-----------|
| One initial training per site (Level 2)   | 1 | 1,893.72  | 2 |  | 3,787.44  |
| One initial training per site (Level 3)   | 1 | 3,787.44  | 3 |  | 11,362.32 |
| One initial training per site (Level 4-5) | 1 | 5,681.16  | 3 |  | 17,043.48 |
| MoH NCD ToT HW training                   | 1 | 33,140.10 | 1 |  | 33,140.10 |
| MoH NCD ToT CHV training                  | 1 | 23,671.50 | 1 |  | 23,671.50 |
| Peer Educator ToT Training                | 1 | 14,202.90 | 1 |  | 14,202.90 |

|                                                                                                          |   |          |   |  |                   |
|----------------------------------------------------------------------------------------------------------|---|----------|---|--|-------------------|
| Quarterly County and MoH meetings (Average applied as some counties will have more meetings than others) | 3 | 2,367.15 | 1 |  | 2,367.15          |
| Training of facility champions as first-line tech support                                                | 2 | 1,101.00 | 8 |  | 8,808.00          |
| Master trainer of Trainers for facility group of champions                                               | 3 | 1,101.00 | 8 |  | 8,808.00          |
| CHV, peer educator's sensitization sessions                                                              | 2 | 1,101.00 | 8 |  | 8,808.00          |
| <i>Sub-Total</i>                                                                                         |   |          |   |  | <i>131,998.89</i> |

---

**Other Cost (printing and marketing, governance meetings)**

---

|                                                                   |    |                 |      |          |                   |
|-------------------------------------------------------------------|----|-----------------|------|----------|-------------------|
| Printing & marketing (level 2)                                    | 2  | level 2 sites   | 12   | 39.45    | 946.86            |
| Printing & marketing (level 3)                                    | 3  | level 3 sites   | 12   | 78.91    | 2,840.58          |
| Printing & marketing (level 4-5)                                  | 3  | level 4-5 sites | 12   | 79.27    | 2,853.79          |
| Data bundles                                                      | 56 | sites           | 12   | 22.02    | 14,797.44         |
| SMS outreach                                                      | 1  | 400             | 12   | 5.51     | 26,424.00         |
| Consumables per screening                                         | 1  | set             | 2000 | 2.37     | 4,734.30          |
| Mentorship of master trainers and PHC staff                       | 8  | persons         | 4    | 1,101.00 | 35,232.00         |
| Facility monthly performance meetings to enable onward governance | 24 | persons         | 4    | 116.71   | 11,203.78         |
| Supportive supervision for quality assurance and team support     | 2  | persons         | 4    | 4,404.00 | 35,232.00         |
| <i>Sub-Total</i>                                                  |    |                 |      |          | <i>134,264.75</i> |

---

**Total Cost** **5,597,967.27**

---

Table 4: Cost of Conventional Approach

| Cost Description                           | Quantity | Unit Price (GH ₵) | Amount (GH ₵) | Useful Life | Amortized Cost (GH ₵) |
|--------------------------------------------|----------|-------------------|---------------|-------------|-----------------------|
| <b>Equipment Set-up Cost</b>               |          |                   |               |             |                       |
| Desktop computers with 14" monitor         | 80       | 1,300.00          | 104,000.00    | 5           | 20,800.00             |
| Blood pressure monitor digital             | 32       | 900.00            | 28,800.00     | 4           | 7,200.00              |
| Aneroid blood pressure machine             | 16       | 500.00            | 8,000.00      | 6           | 1,333.33              |
| Thermometer                                | 0        | 100.00            | 0.00          | 2           | 0.00                  |
| Weighing scale with stadiometer            | 24       | 2,000.00          | 48,000.00     | 6           | 8,000.00              |
| Glucometer                                 | 32       | 300.00            | 9,600.00      | 3           | 3,200.00              |
| Waist circumference tape measure           | 8        | 50.00             | 400.00        | 2           | 200.00                |
| Blood chemistry analyser                   | 8        | 17,378.00         | 139,024.00    | 5           | 27,804.80             |
| Internet set up at OPD area                | 8        | 16,000.00         | 128,000.00    | 4           | 32,000.00             |
| Printer                                    | 8        | 11,000.00         | 88,000.00     | 8           | 11,000.00             |
| Server unit for EMR (equipment and set up) | 8        | 12,000.00         | 96,000.00     | 5           | 19,200.00             |
| <i>Sub-Total</i>                           |          |                   |               |             | <i>130,738.13</i>     |
| <b>Consumables (Variable Cost)</b>         |          |                   |               |             |                       |
| Utility cost for NCD clinic (Electricity)  | 8        | 3,000.00          | 12            |             | 288,000.00            |
| Utility cost for NCD clinic (Water)        | 8        | 1,500.00          | 12            |             | 144,000.00            |
| Maintenance                                | 8        | 5,000.00          | 12            |             | 480,000.00            |
| Monthly allowance for NCD clinic           | 184      | 100.00            | 12            |             | 220,800.00            |
| Medicines' cost                            | 338      | 23,122.75         | 12            |             | 277,473.00            |
| Latex gloves                               | 80       | 60.00             | 12            |             | 57,600.00             |
| Twist top lancet                           | 80       | 20.00             | 12            |             | 19,200.00             |
| Alcohol swabs                              | 80       | 30.00             | 12            |             | 28,800.00             |
| Surgical spirits                           | 80       | 35.00             | 12            |             | 33,600.00             |
| Cotton wool                                | 40       | 19.00             | 12            |             | 9,120.00              |
| Face mask                                  | 80       | 15.00             | 12            |             | 14,400.00             |
| Glucose test strip                         | 3200     | 10.00             | 12            |             | 384,000.00            |

|                                                                                                            |                      |                     |    |                  |                              |
|------------------------------------------------------------------------------------------------------------|----------------------|---------------------|----|------------------|------------------------------|
| Hba1c cartridges                                                                                           | 1000                 | 80.00               | 4  |                  | 320,000.00                   |
| Stationery                                                                                                 | 8                    | 1,700.00            | 12 |                  | 163,200.00                   |
| Laminated ID cards and equipment                                                                           | 8                    | 1,200.00            | 12 |                  | 115,200.00                   |
| Batteries for blood pressure and glucometers                                                               | 8                    | 200.00              | 12 |                  | 19,200.00                    |
| <i>Sub-Total</i>                                                                                           |                      |                     |    |                  | <i>2,574,593.00</i>          |
| <b>Facility Staff involved in Akoma Pa</b>                                                                 | <b>Annual Salary</b> |                     |    |                  | <b>Annualized total cost</b> |
| Medical Officer                                                                                            | 3                    | 47,347.27           | 8  |                  | 1,136,334.48                 |
| Pharmacist                                                                                                 | 2                    | 41,373.98           | 8  |                  | 661,983.68                   |
| Enrolled Nurse                                                                                             | 2                    | 17,512.93           | 8  |                  | 280,206.88                   |
| Lab Scientist                                                                                              | 2                    | 29,533.05           | 8  |                  | 472,528.80                   |
| Nutritionists                                                                                              | 2                    | 32,676.18           | 8  |                  | 522,818.88                   |
| Community Health Nurse                                                                                     | 0                    | 15,563.67           | 8  |                  | 0.00                         |
| <i>Sub-Total</i>                                                                                           |                      |                     |    |                  | <i>3,073,872.72</i>          |
| <b>Training and capacity-building events</b>                                                               | <b>Persons</b>       | <b>No. of times</b> |    | <b>Unit Cost</b> |                              |
| Quarterly regional and MoH meetings (Average applied as some counties will have more meetings than others) | 2                    | 4                   | 8  | 100.00           | 6,400.00                     |
| <i>Sub-Total</i>                                                                                           |                      |                     |    |                  | <i>6,400.00</i>              |
| <b>Other Cost Items (printing, marketing, and governance)</b>                                              |                      |                     |    |                  |                              |
| Data review meetings and monthly performance review meetings                                               | 8                    | 12                  |    | 500.00           | 48,000.00                    |
| <i>Sub-Total</i>                                                                                           |                      |                     |    |                  | <i>48,000.00</i>             |
| <b>Total Cost</b>                                                                                          |                      |                     |    |                  | <b>5,833,603.85</b>          |
